# Supplementary material for: Dysregulated immune responses in COVID-19 patients correlating with disease severity and invasive oxygen requirements
Source: bioRxiv or medRxiv preprint supplement (doi:10.1101/2021.09.14.21263541), 2021-09-17

**Supplementary Figure 1**

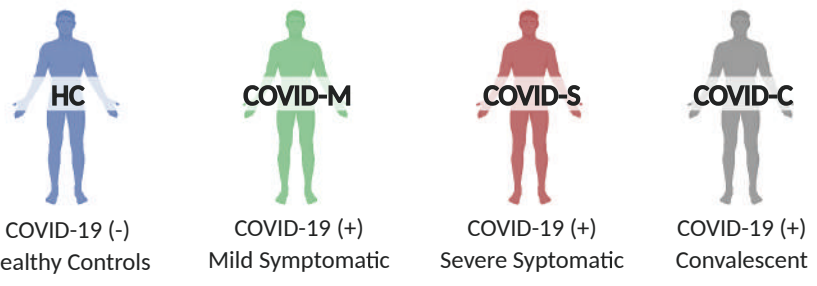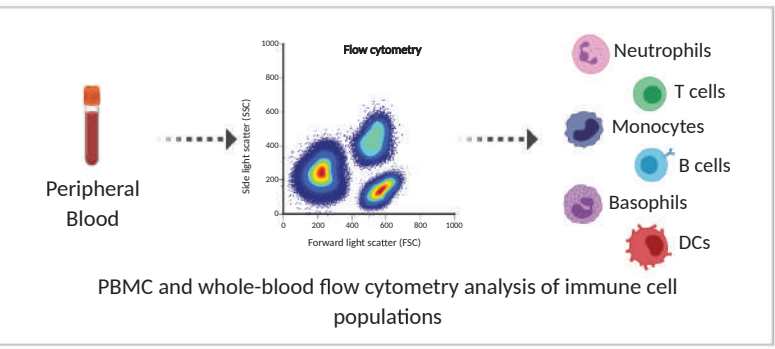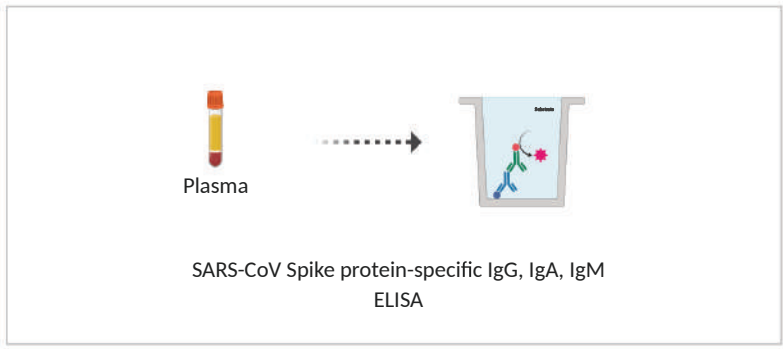

# Supplementary Figure 2

A.

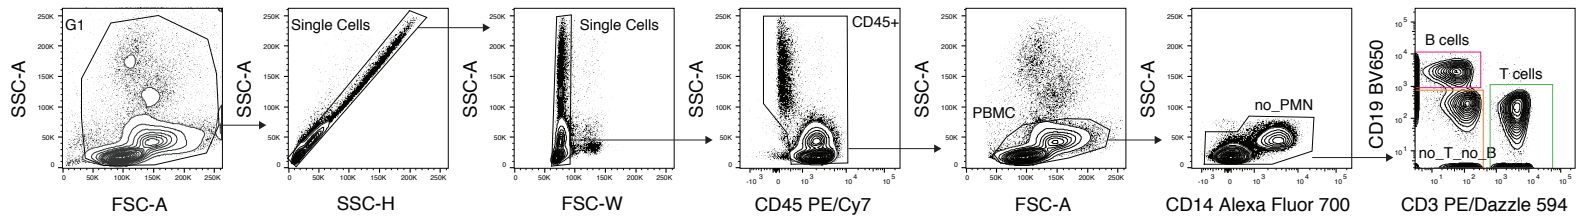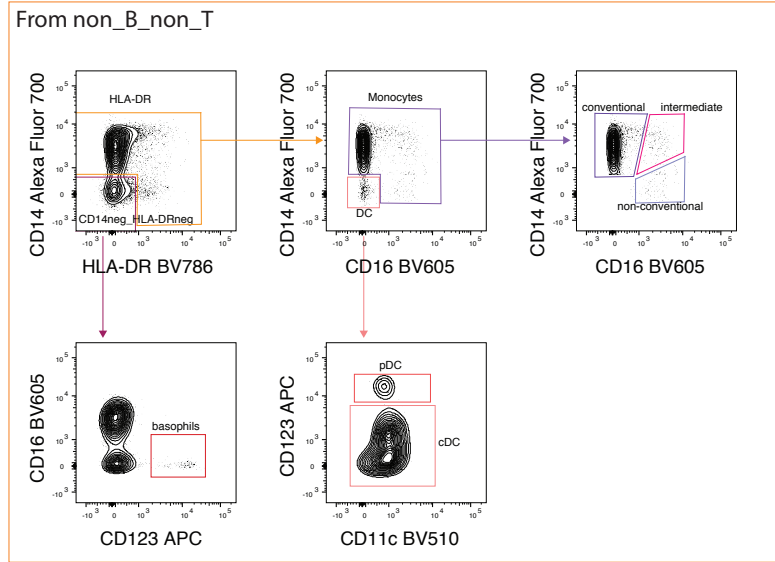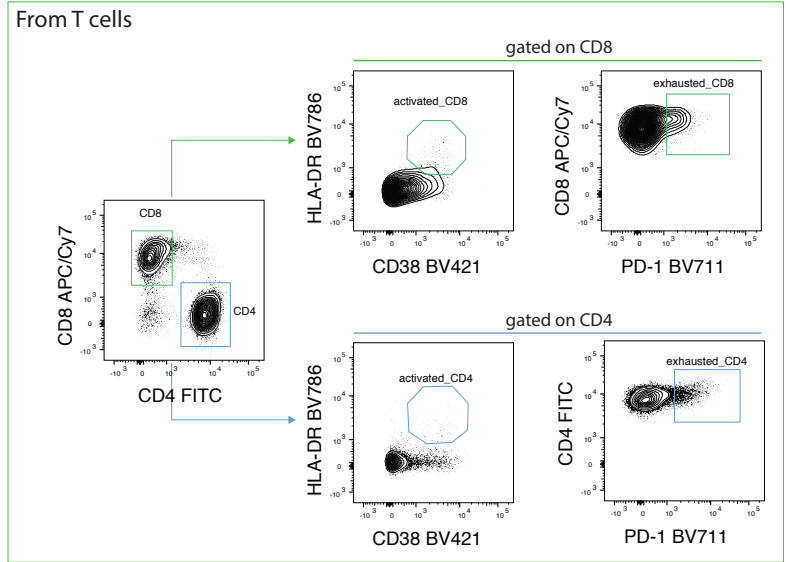

B.

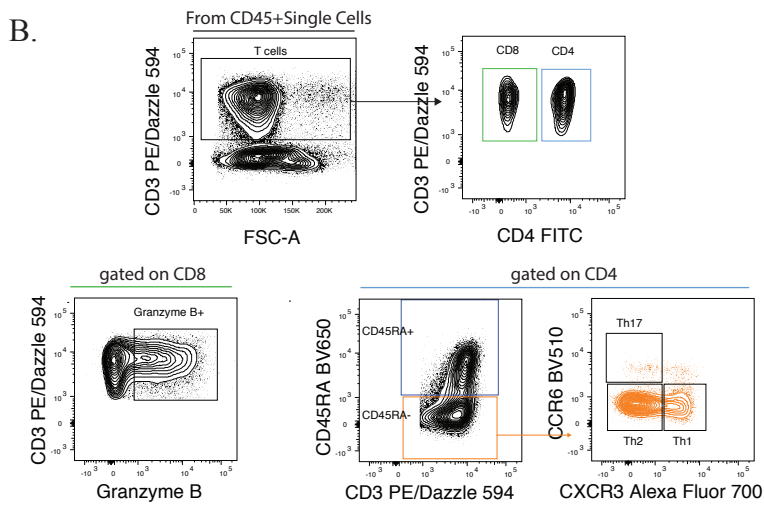

C.

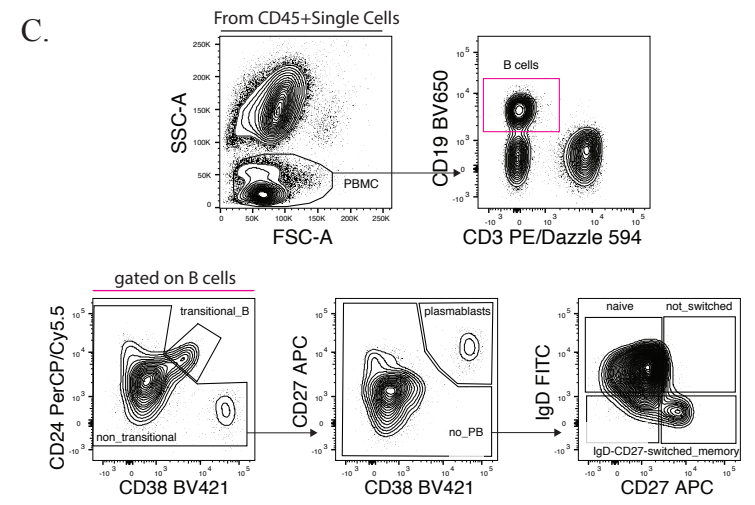

D.

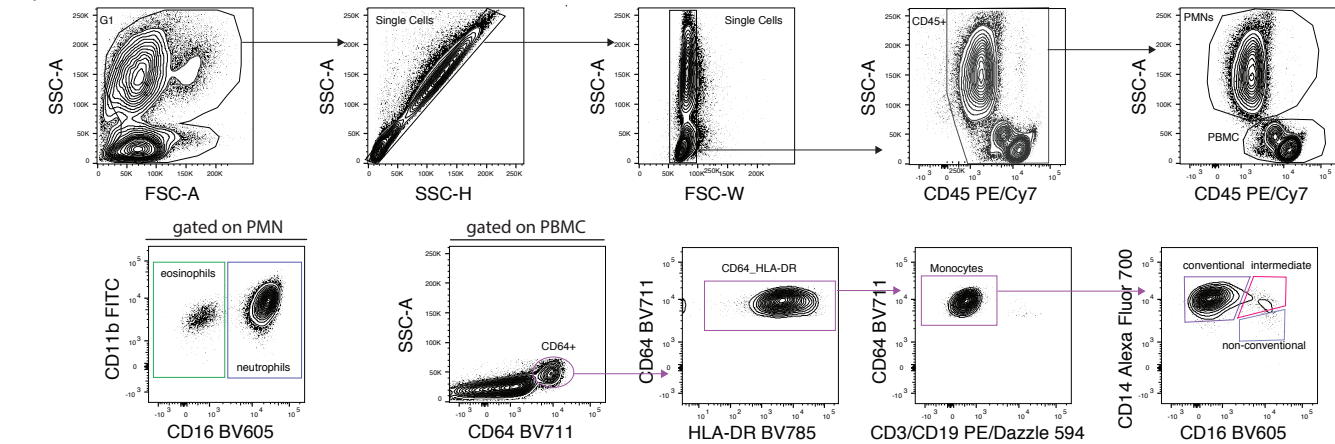

# Supplementary Figure 3

A.

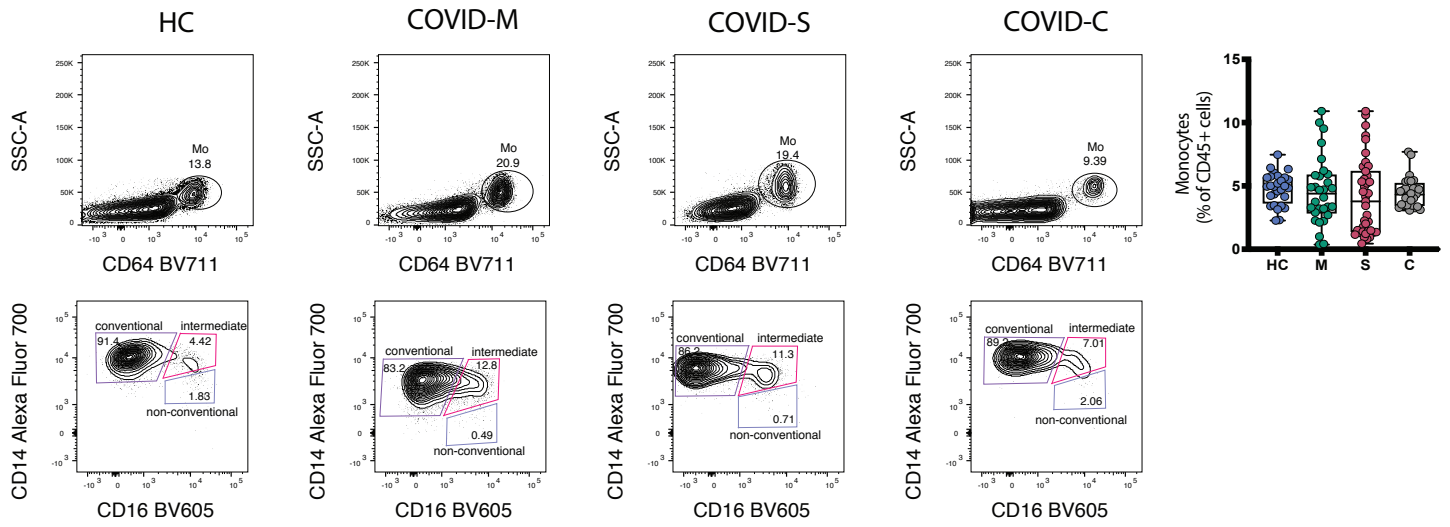

B.

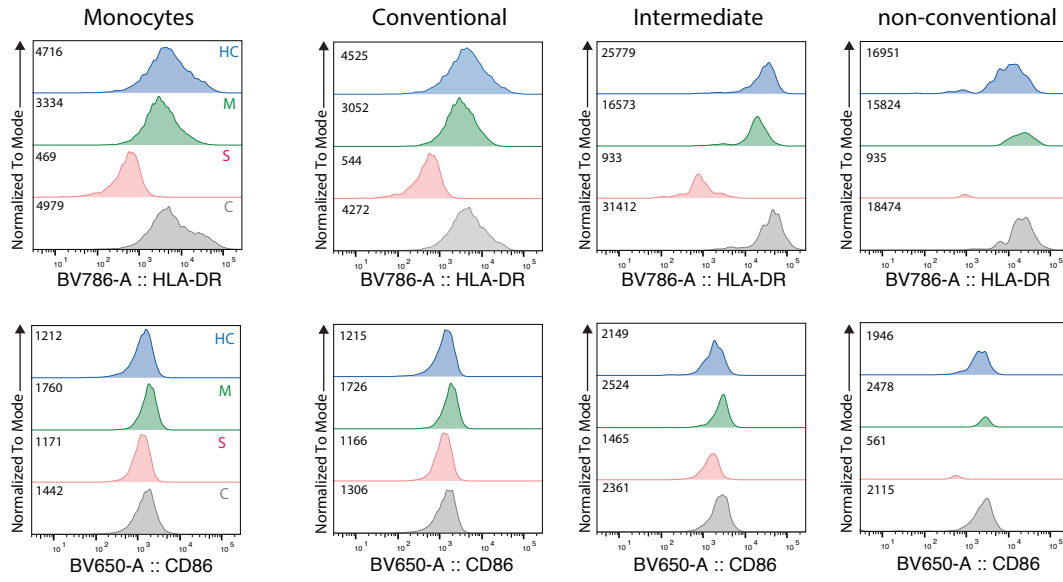

C.

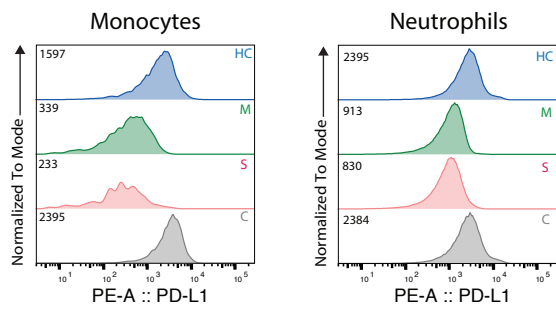

# Supplementary Figure 4

**A.**

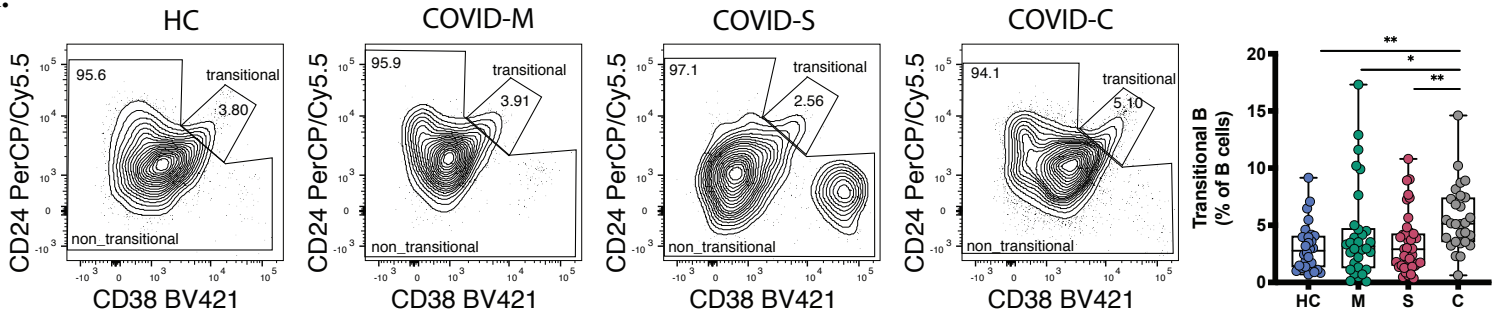

**B.**

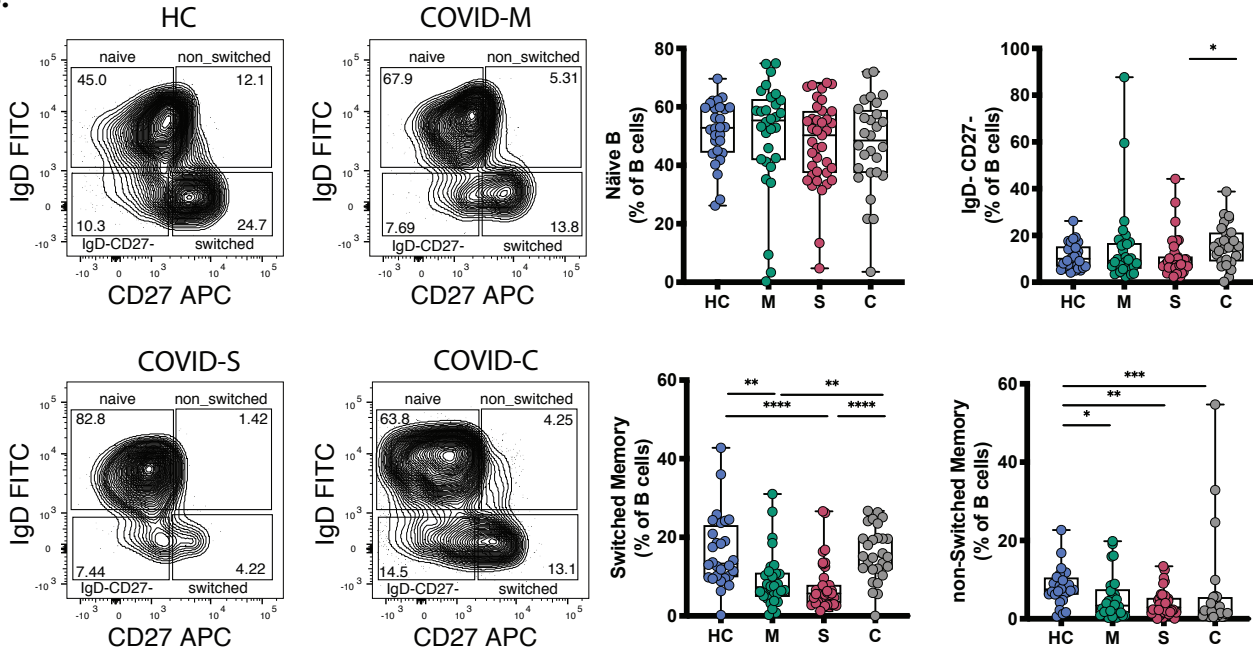

Supplement: Supplementary file [file media-1.pdf]
